# Supplementary material for: Evaluation of modern and mid-Holocene seasonal precipitation of the Mediterranean and northern Africa in the CMIP5 simulations
Source: Copernicus journal article supplement (doi:10.5194/cp-10-551-2014), 2014-03-20

Supplementary Material

**Evaluation of seasonal climates of Mediterranean and Northern Africa in the CMIP5 simulations**

Ana Perez-Sanz<sup>1,2</sup>, Guangqi Li<sup>2</sup>, Penélope González-Sampériz<sup>1</sup>, Sandy P. Harrison<sup>2,3</sup>

1: Pyrenean Institute of Ecology, (IPE)-CSIC, Avda. Montañana 1005, 50059 Zaragoza, Spain.

2: Department of Biological Sciences, Macquarie University, North Ryde, NSW 2109, Australia.

3: Department of Geography & Environmental Sciences, School of Human and Environmental Sciences, Reading University, Whiteknights, Reading RG6 6AB, UK.

This auxiliary material contains (a) figures showing comparisons between CRU dataset and *historical* simulations of the seasonal and annual precipitation for each 5°-latitudinal band of the study area.

Figure S1. Comparison of the mean annual and mean seasonal precipitation (mm) between the CRU data and *historical* simulations for each 5 latitude band. Because there is a very small amount of precipitation in some latitude band, the axis scale starts at 0 but differs in the maximum value depending on the total rainfall values. Only six models have *historical* simulations. For these models we also present the *piControl* simulations. The historical simulations are shown in color while the *piControl* simulations for each model are shown by a dash line. The grey bars represent one standard deviation of the mean annual and mean seasonal precipitation from observations. The seasons are defined as spring (March, April, May), summer (June, July, August), autumn (September, October, November) and winter (December, January, February).

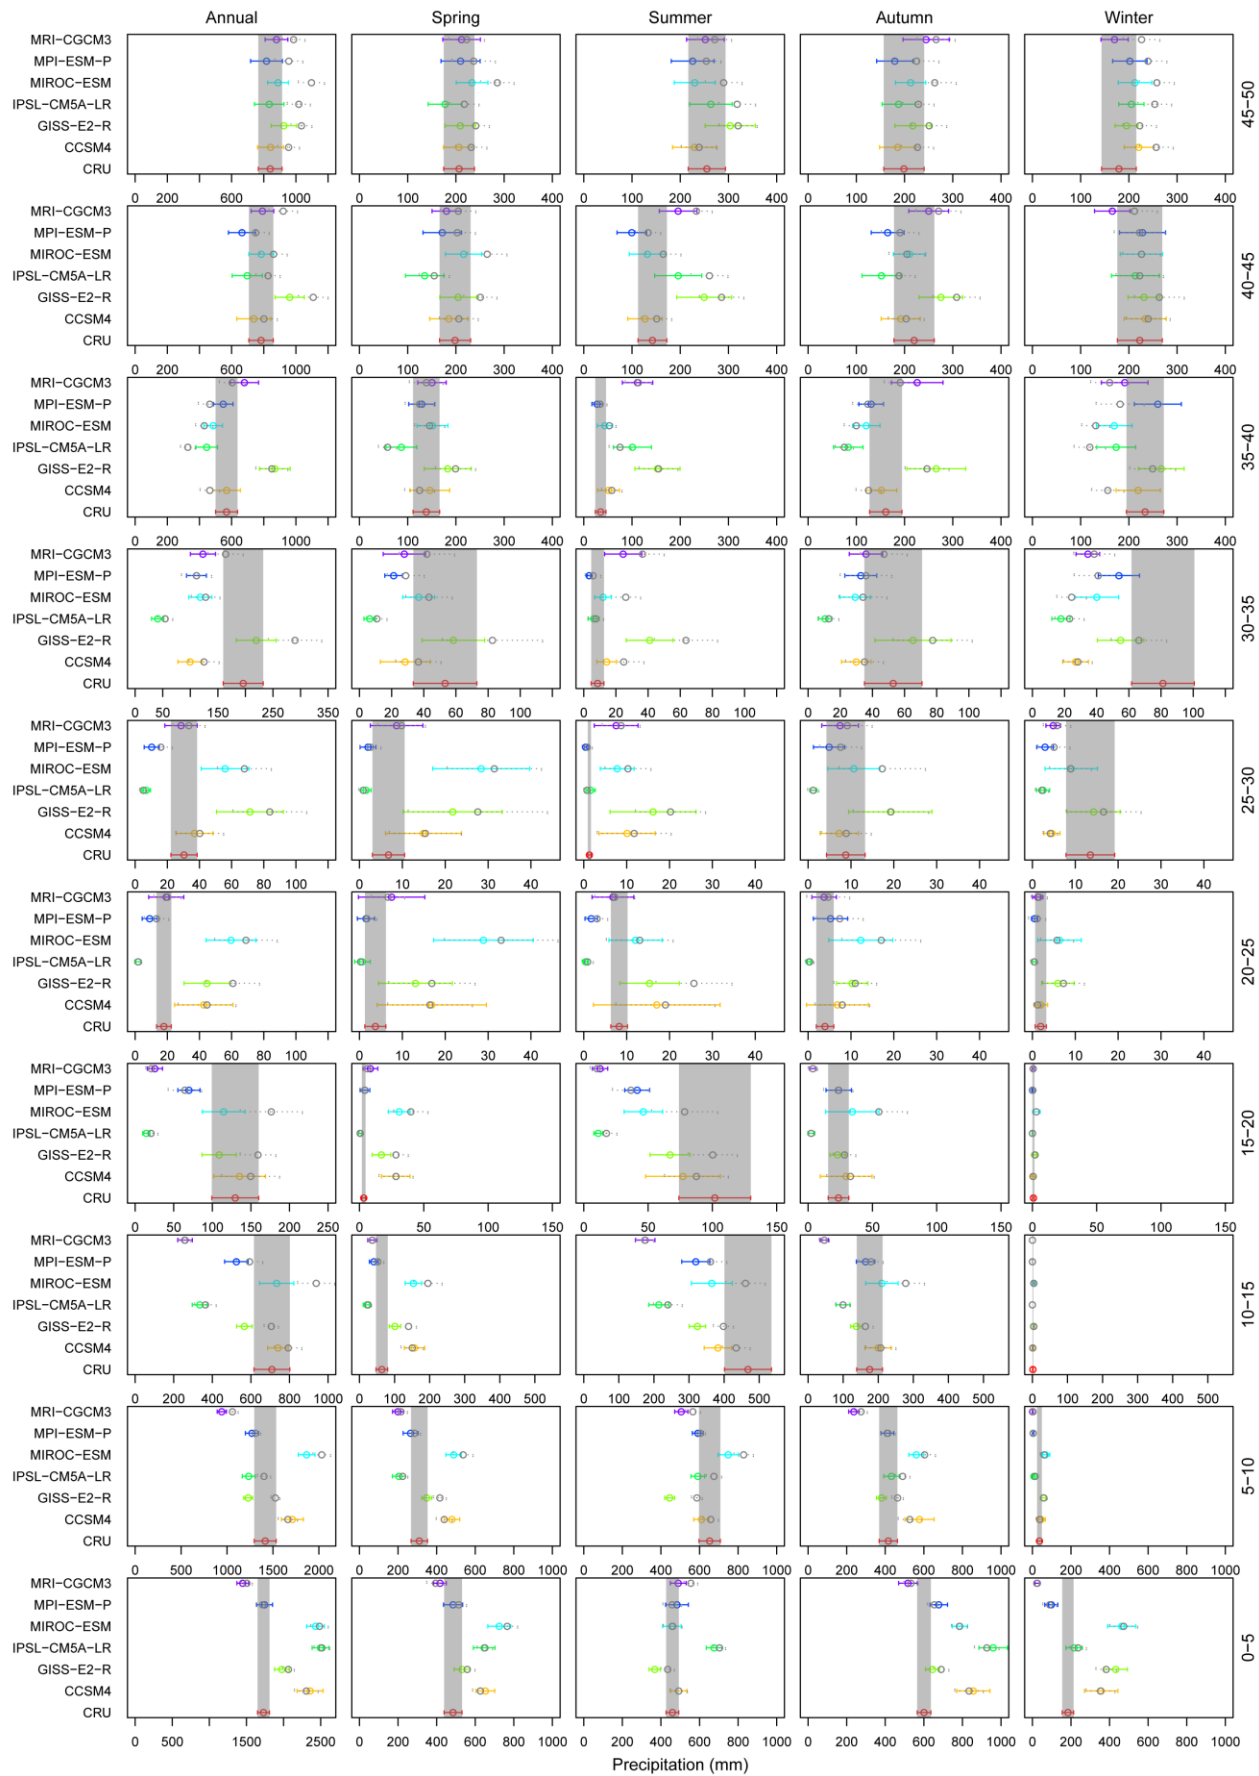

Supplement: Supplementary file 1 [file cp-10-551-2014-supplement.pdf]
